# Supplementary material for: Visualization of rapid electron precipitation via chorus element wave–particle interactions
Source: PubMed Central journal article supplement (PMC6335576; doi:10.1038/s41467-018-07996-z), 2019-01-16
Supplement: 41467_2018_7996_MOESM1_ESM.pdf [file 41467_2018_7996_MOESM1_ESM.pdf]

## **Description of Additional Supplementary Files**

File Name: Supplementary Movie 1

Description: Slow-motion movie (7-s duration) of all-sky EMCCD images and simultaneous observed chorus elements at 13:01 UT, 30 March 2017. The auroral emissions in the target area are associated with large-amplitude chorus waves. MPEG (.MP4) movie shows the dynamic spatial evolution of auroral emissions associated with large-amplitude chorus waves. The aurora images were taken at 100 frames per second using a HAMAMATSU EMCCD camera equipped with an RG665 glass filter. The moving bar in the chorus waves traces the time progress of the movie.
